# Supplementary material for: Socioeconomic and geographic inequalities in access to improved drinking water among rural households in Ghana: Evidence from the 2017/18 Multiple Indicator Cluster Survey
Source: Research Square preprint supplement (doi:10.21203/rs.3.rs-8808096/v1), 2026-02-24
Supplement: Supplementary file 1 [file 0385fce6552423fe1ddc097e.docx]

**Supplementary Information**

Table S1: Inferential statistics for the study

| Explanatory variables | Model I | | Model II | |
| --- | --- | --- | --- | --- |
| OR | 95% CI | aOR | 95% CI |
| *Sex* *of household head* |  |  |  |  |
| Male | 1 | 1,1 | 1 | 1,1 |
| Female | 1.49*** | [1.28-1.73] | 1.67*** | [1.41-1.98] |
| *Educational attainment of household head* | |  |  |  |
| No education | 1 | 1,1 | 1 | 1,1 |
| Primary/JHS | 1.29*** | [1.13-1.46] | 1.30** | [1.11-1.52] |
| SHS/Higher | 1.88*** | [1.48-2.40] | 1.25 | [0.94-1.65] |
| *Wealth status of household head* |  |  |  |  |
| Poor | 1 | 1,1 | 1 | 1,1 |
| Middle | 2.74*** | [2.22-3.38] | 3.28*** | [2.61-4.13] |
| Rich | 7.04*** | [4.88-10.17] | 7.64*** | [5.18-1129] |
| *Ecological zone* |  |  |  |  |
| Coastal zone | 1 | 1,1 | 1 | 1,1 |
| Middle zone | 0.85 | [0.71-1.00] | 1.25* | [1.04-1.51] |
| Savannah zone | 1.05 | [0.89-1.25] | 3.14*** | [2.53-3.91] |
| *Religion of household head* |  |  |  |  |
| Christian | 1 | 1,1 | 1 | 1,1 |
| Muslim | 0.67*** | [0.57-0.78] | 0.63*** | [0.53-0.76] |
| Traditionalist | 0.75** | [0.62-0.91] | 0.88 | [0.71-1.10] |
| No religion | 0.66** | [0.51-0.86] | 0.78 | [0.59-1.04] |
| *Household size* |  |  |  |  |
| 1-2 members | 1 | 1,1 | 1 | 1,1 |
| 3-4 members | 1.04 | [0.85-1.29] | 1.14 | [0.91-1.43] |
| ≥5 members | 0.85 | [0.70-1.02] | 1.07 | [0.87-1.33] |
| *Internet access at home* |  |  |  |  |
| Yes | 1 | 1,1 | 1 | 1,1 |
| No | 0.38*** | [0.28-0.51] | 0.67* | [0.49-0.93] |
| *Ownership of mobile telephone* |  |  |  |  |
| Yes | 1 | 1,1 | 1 | 1,1 |
| No | 0.84* | [0.72-0.98] | 1.02 | [0.86-1.21] |
| *Treat water to become safe for drinking* | | |  |  |
| Yes | 1 | 1,1 | 1 | 1,1 |
| No | 3.52*** | [2.88-4.31] | 3.80*** | [3.05-4.72] |
| *Travelling time to get water* | | |  |  |
| 0-30mins | 1 | 1,1 | 1 | 1,1 |
| ≥31minutes | 1.97*** | [1.70-2.28] | 1.90*** | [1.61-2.23] |
| *Times person collected water last 7days* | | |  |  |
| 0-4 times | 1 | 1,1 | 1 | 1,1 |
| 5-9 times | 0.83 | [0.65-1.05] | 0.87 | [0.67-1.12] |
| ≥10 times | 0.76** | [0.62-0.92] | 0.76* | [0.61-0.95] |
| *Insufficiency of water in the last month* | | |  |  |
| Yes | 1 | 1,1 | 1 | 1,1 |
| No | 0.70** | [0.56-0.89] | 0.64** | [0.50-0.83] |
| **Model fit testing** |  |  |  |  |
| N |  |  | 5838 |  |
| R2 |  |  | 0.106 |  |
| *LR X2(19)* |  |  | 646,09*** |  |
| Linktest |  |  |  |  |
| _hat |  |  | 0.998*** | [0.816-1.180] |
| _hatsq |  |  | 0.001 | [-0.066-0.068] |

OR= Odds Ratio, aOR=adjusted Odds Ratio, CI=Confidence Interval in square brackets; *p<0.05, **p<0.01, ***p<0.001

Table S2: Multicollinearity testing

| Explanatory variables | VIF | 1/VIF |
| --- | --- | --- |
| Wealth | 1.41 | 0.710204 |
| Education | 1.36 | 0.732687 |
| Ecological zone | 1.35 | 0.741593 |
| Access to internet | 1.15 | 0.871369 |
| Religion | 1.14 | 0.875110 |
| Household size | 1.14 | 0.879739 |
| Sex | 1.13 | 0.883649 |
| Ownership of phone | 1.10 | 0.910543 |
| Times person collected water last 7days | 1.08 | 0.930021 |
| Travelling time to get water | 1.07 | 0.932420 |
| Insufficiency of water in the last month | 1.01 | 0.989668 |
| Treat water to become safe for drinking | 1.01 | 0.994546 |
| Mean VIF | 1.16 |  |
